# Supplementary material for: Autotrophic component of soil respiration is repressed by drought more thanthe heterotrophic one in dry grasslands
Source: Copernicus journal article supplement (doi:10.5194/bg-13-5171-2016), 2016-09-19
Supplement: Supplementary file 1 [file bg-13-5171-2016-supplement.pdf]

Supplement of Biogeosciences, 13, 5171–5182, 2016  
<http://www.biogeosciences.net/13/5171/2016/>  
doi:10.5194/bg-13-5171-2016-supplement  
© Author(s) 2016. CC Attribution 3.0 License.

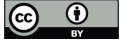

*Supplement of*

## **Autotrophic component of soil respiration is repressed by drought more than the heterotrophic one in dry grasslands**

**János Balogh et al.**

*Correspondence to:* János Balogh et al. (balogh.janos@mkk.szie.hu)

The copyright of individual parts of the supplement might differ from the CC-BY 3.0 licence.

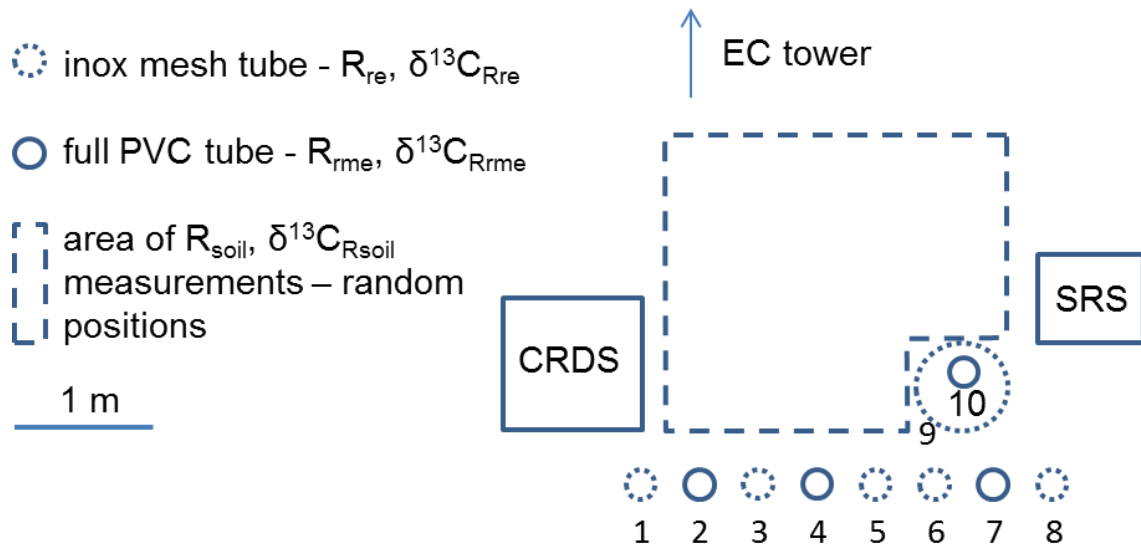

Fig. S1 Schematic map of the experimental area. Dashed line represents the area of undisturbed soil ( $R_{soil}$ ,  $\delta^{13}C_{Rsoil}$  measurements), dotted circles represent tubes with inox mesh cover ( $R_{re}$ ,  $\delta^{13}C_{Rre}$  measurements) and solid circles represent full PVC tubes ( $R_{rme}$ ,  $\delta^{13}C_{Rrme}$  measurements). Numbers indicate the positions of the tubes.

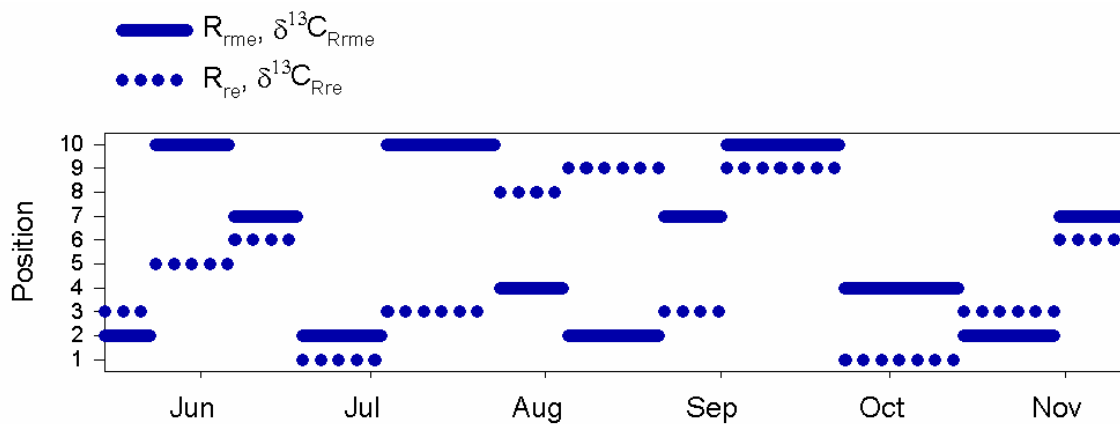

Fig. S2 Position changes of  $R_{rme}$ ,  $\delta^{13}C_{Rrme}$  and  $R_{re}$ ,  $\delta^{13}C_{Rre}$  measurements during the study period.  $R_{soil}$  and  $\delta^{13}C_{Rsoil}$  positions were also changed at the same time within the undisturbed area of the experimental plot (Fig. S1).

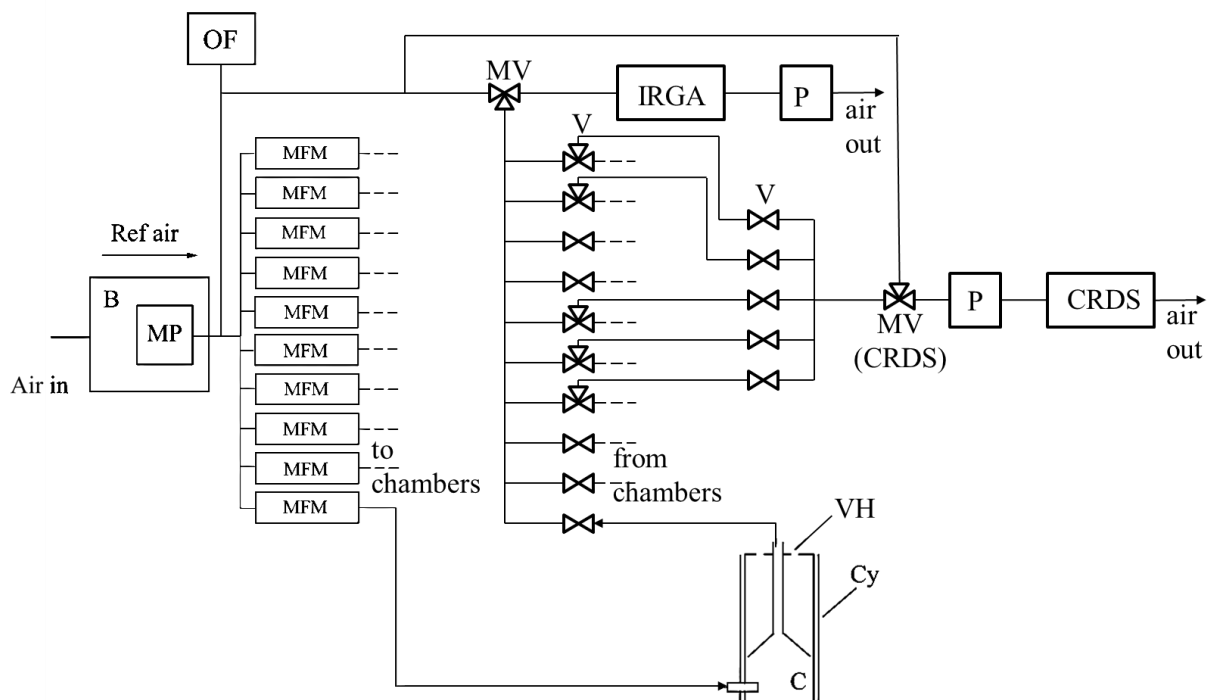

Fig. S3 Schematic air-flow diagram of the coupled SRS-CRDS system (B: buffer volume, MP: main pump, P: sampling pump, OF: overflow, MFM: mass flowmeters, MV: main valve, V: valves, VH: vent hole, C: chamber with a funnel, Cy: metal cylinder, IRGA: gas analyzer, Ref air: reference air flow, air out: air outlet from the system). Chambers 1, 2, 5, 6, 7 of the SRS were attached to the CRDS through a magnetic valve system.

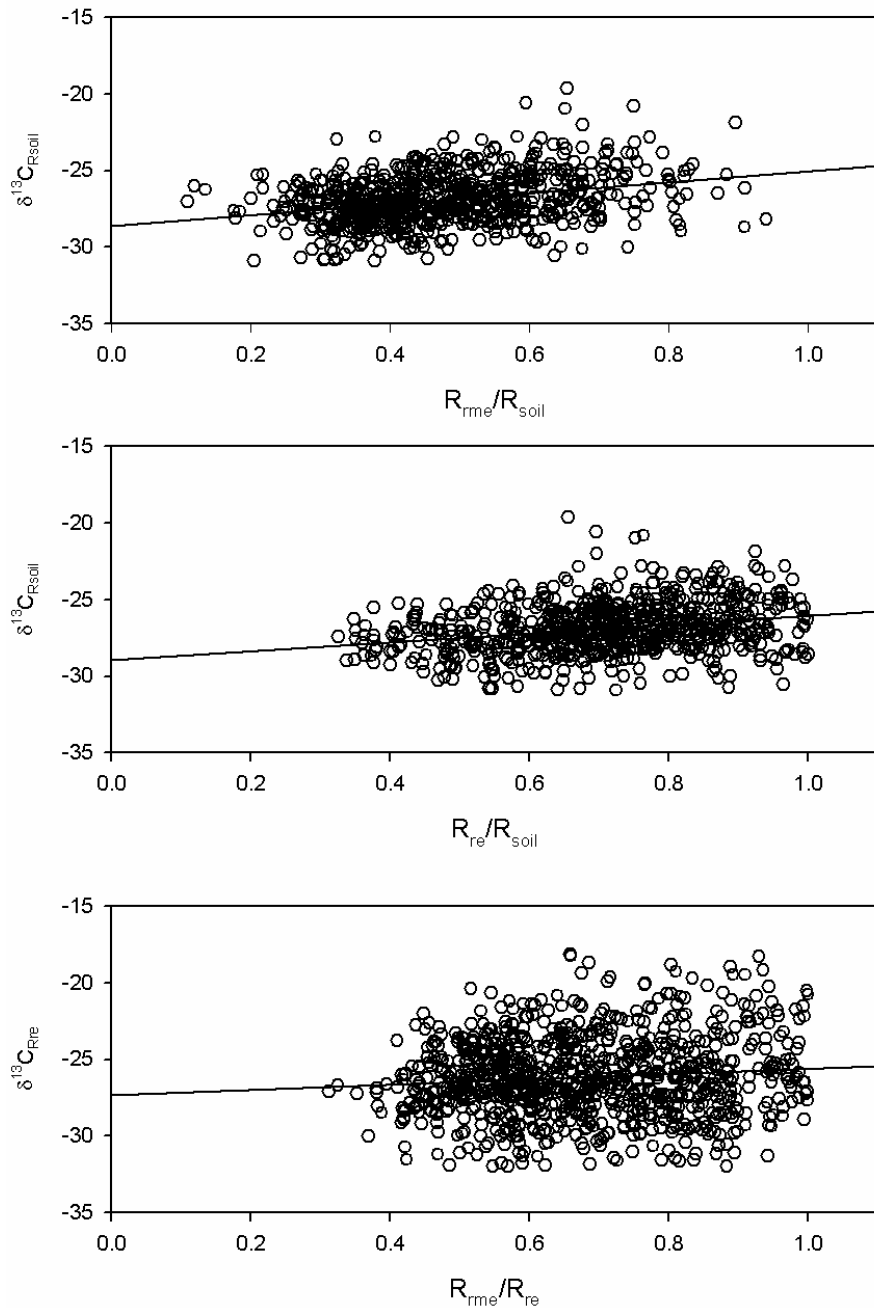

Fig. S4 Y-intercepts of these linear correlations were used as estimations for  $\delta^{13}\text{C}_{\text{Rmychiz}}$  (a),  $\delta^{13}\text{C}_{\text{Rrhizo}}$  (b) and  $\delta^{13}\text{C}_{\text{Rmyc}}$  (c).  $\delta^{13}\text{C}_{\text{Rmychiz}}$  and  $\delta^{13}\text{C}_{\text{Rrhizo}}$  were used in mixing models calculating component contributions.

Equations:

$$\delta^{13}\text{C}_{\text{Rsoil}} \text{ vs. } R_{\text{rme}}/R_{\text{soil}} \text{ (y intercept is } \delta^{13}\text{C}_{\text{Rmychiz}}\text{): } y = 3.54x - \mathbf{28.6}, R^2 = 0.0921, P < 0.0001$$

$$\delta^{13}\text{C}_{\text{Rsoil}} \text{ vs. } R_{\text{re}}/R_{\text{soil}} \text{ (y intercept is } \delta^{13}\text{C}_{\text{Rrhizo}}\text{): } y = 2.9x - \mathbf{28.9}, R^2 = 0.0683, P < 0.0001$$

$$\delta^{13}\text{C}_{\text{Rre}} \text{ vs. } R_{\text{rme}}/R_{\text{re}} \text{ (y intercept is } \delta^{13}\text{C}_{\text{Rmyc}}\text{): } y = 1.79x - \mathbf{27.2}, R^2 = 0.0137, P = 0.0032$$
